# Supplementary material
Source: publisher figshare collection journal article supplement (https://karger.figshare.com/ndownloader/files/24493286)
Supplement: Supplementary file 1 [file 24493286]

**Suppl. Table 3. Comparison of renal pathological features between different FPW groups**

|  | FPW <869nm (n=26) | | FPW ≥869nm (n=37) | | *P* value |
| --- | --- | --- | --- | --- | --- |
|  | Score | *rs*a(*P* value) | Score | *rs*a(*P* value) |
| Glomerular TMA |  |  |  |  |  |
| Endothelial cell swelling and proliferation | 1(0-1) | 0.235(0.248) | 1(0-1) | -0.186(0.269) | 0.891 |
| Mesangiolysis | 0(0-0) | 0.150(0.466) | 0(0-0) | **0.351(0.033)** | 0.351 |
| Capillary fibrinoid necrosis and/or thrombi | 0(0-0) | -0.173(0.397) | 0(0-0) | 0.185(0.273) | 0.473 |
| GBM double contours | 0.5(0-1) | **0.403(0.041)** | 0(0-1) | 0.139(0.411) | 0.578 |
| Mesangial proliferation | 1(0-1) | 0.129(0.529) | 0(0-1) | -0.013(0.939) | 0.714 |
| Global and segmental glomerulosclerosis | 1(1-2) | -0.268(0.185) | 1(1-2) | **0.369(0.025)** | 0.284 |
| Subendothelial edema on EM | 1(1-1.25) | **0.515(0.008)** | 1(0.5-2) | 0.027(0.875) | 0.443 |
| Arteriolar and arterial TMA |  |  |  |  |  |
| Thrombi | 0(0-1) | -0.038(0.852) | 0(0-0) | 0.199(0.237) | 0.321 |
| Endothelial cell swelling and subintimal myxiod edema | 1(1-3) | 0.143(0.484) | 2(1-3) | -0.294(0.078) | 0.150 |
| Arteriolar fibrinoid necrosis | 0(0-0) | 0.093(0.650) | 0 | - | 0.233 |
| Onion skin lesions | 1(1-3) | -0.371(0.062) | 2(0.5-3) | -0.199(0.239) | 0.085 |
| Arteriolar hyalinosis | 0(0-1.25) | 0.171(0.405) | 0(0-0.5) | -0.307(0.064) | 0.347 |
| Tubulointerstitial lesions |  |  |  |  |  |
| Tubular atrophy/Interstitial fibrosis | 2(1-3) | -0.058(0.778) | 3(1-3) | -0.063(0.710) | 0.060 |
| Scoring of pathological variables was expressed as median (interquartile range).Abbreviations: FPW, foot process width; TMA, thrombotic microangiopathy; EM, electron microscopy; GBM, glomerular basement membrane.  aSpearman's coefficient. | | | | | |
